# Supplementary material
Source: publisher figshare collection journal article supplement (https://tandf.figshare.com/ndownloader/files/21436716)
Supplement: Supplementary file 1 [file 21436716]

**Supporting information**


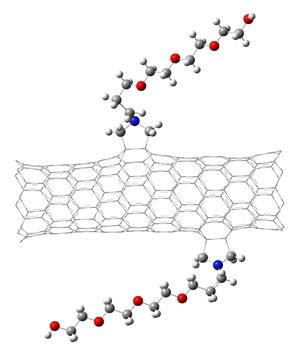

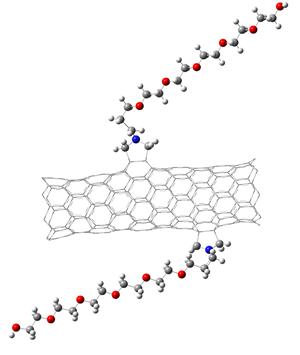


**(a)**

**(b)**


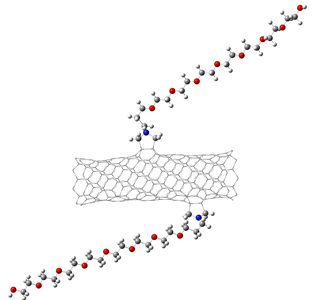


**(c)**

**Figure SF1.** Schematic representation of the functionalized SWCNTs with (a) 33.68% (b) 48.42% and (c) 63.16% weight percent of PEG.
